# Supplementary material for: Growth-Promoting Effects of Press Water from the Mechanical Drying of Douglas-Fir Wood Chips on Lignocellulolytic Fungi
Source: Research Square preprint supplement (doi:10.21203/rs.3.rs-1279036/v1), 2022-01-25
Supplement: Supplementary file 1 [file 2510b7321396f3f097df0573.docx]

**Additional file**

**Growth-promoting effects of press water from the mechanical drying of Douglas fir wood chips on lignocellulolytic fungi**

Manfred J. Reppke1†, Rebecca Gerstner1, Elisabeth Windeisen-Holzhauser2, Klaus Richter2, J. Philipp Benz1,3*

*Correspondence: [benz@hfm.tum.de](mailto:benz@hfm.tum.de)

1Professorship of Fungal Biotechnology in Wood Science, Holzforschung München, TUM School of Life Sciences, Technical University of Munich, Hans-Carl-von-Carlowitz-Platz 2, 85354 Freising, Germany

2Chair of Wood Science, Holzforschung München, TUM School of Life Sciences, Technical University of Munich, Winzererstr. 45, 80797 Munich, Germany

3Institute for Advanced Study, Technical University of Munich, Lichtenbergstraße 2a, 85748 Garching, Germany

This file contains:

Figure S1

Figure S2

Figure S3

Figure S4

Figure S5

Table S1

Table S2

**Supplemental Figures**





Fig. S1 Concentration of dissolved sugars in Douglas-fir PW without bark measured in a HPAEC-PAD. Error bars represent the standard deviation (n=3).


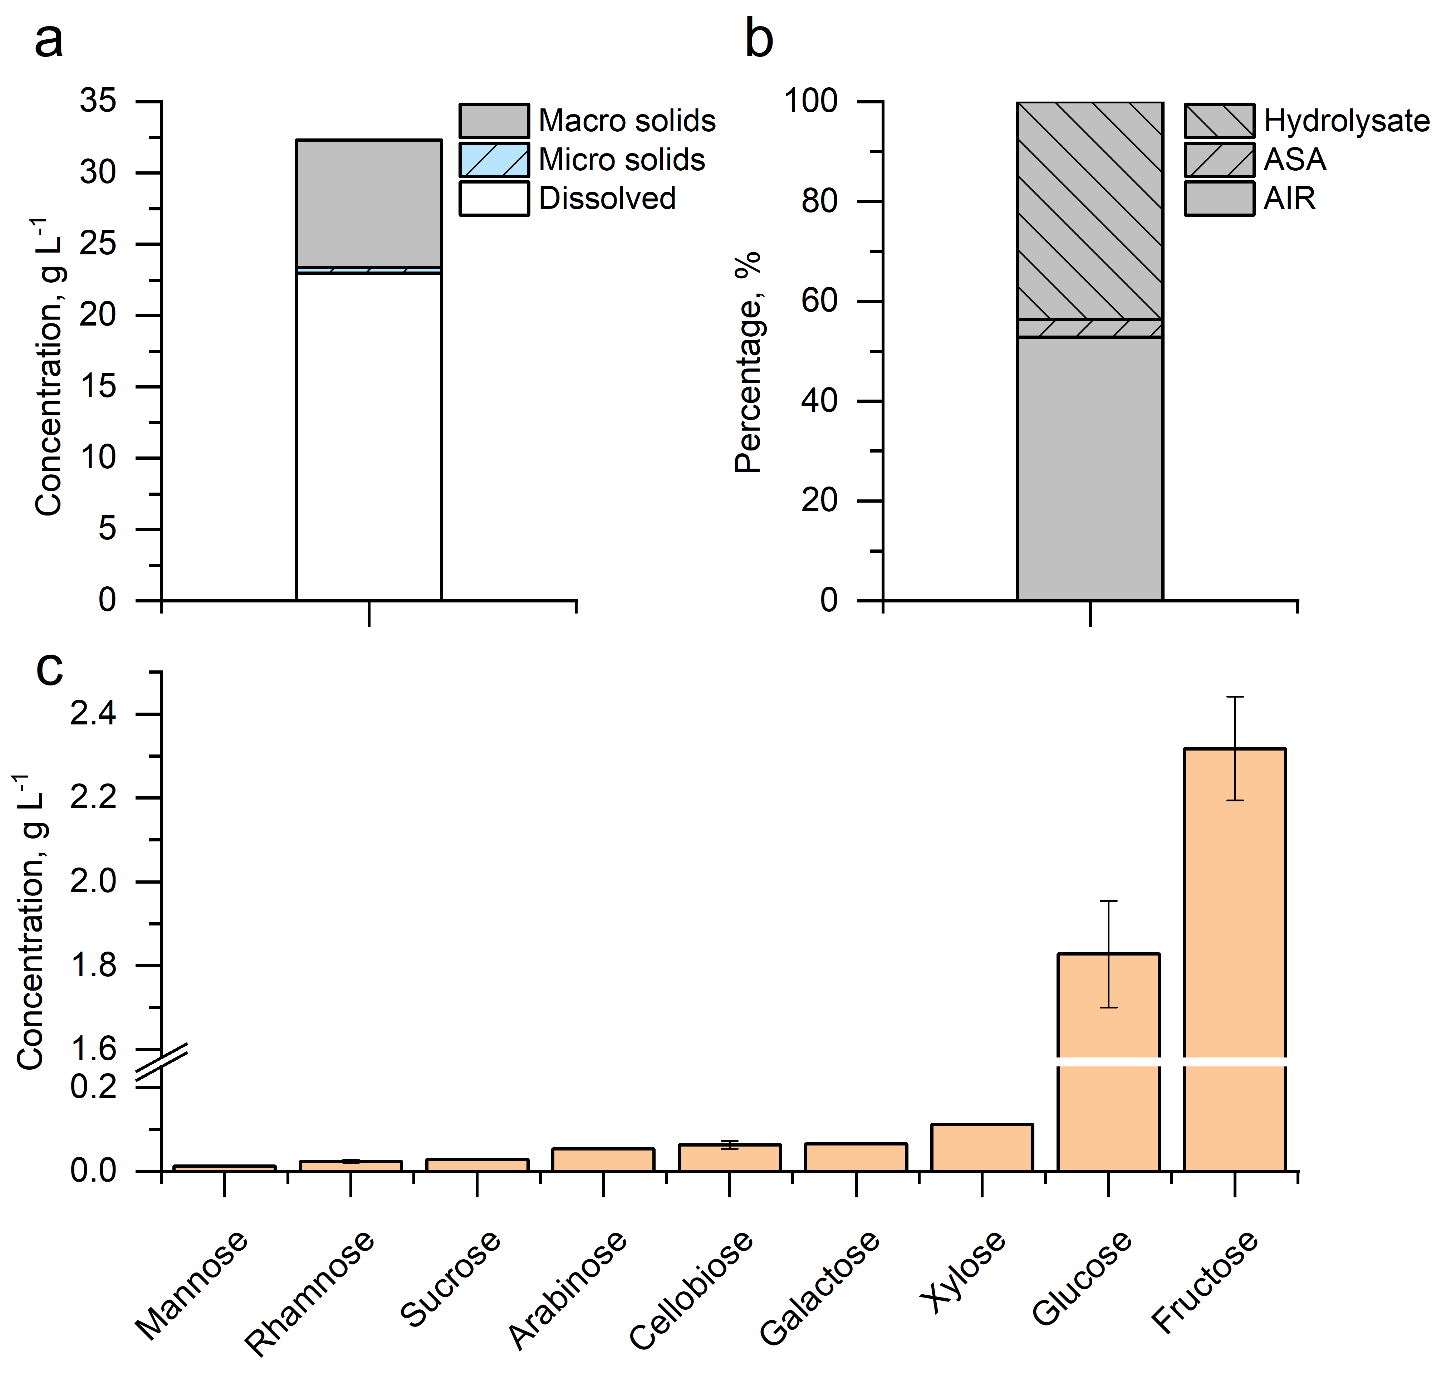


Fig. S2 Physico-chemical analysis of press water from Douglas-fir with bark (PWB). **a** Concentration of macro solids, micro solids and dissolved substances. **b** Mass percentage of hydrolysate, acid soluble aromatics, and acid insoluble residues of PWB solids after acid hydrolysis. **c** concentration of dissolved sugars measured with a HPAEC-PAD.


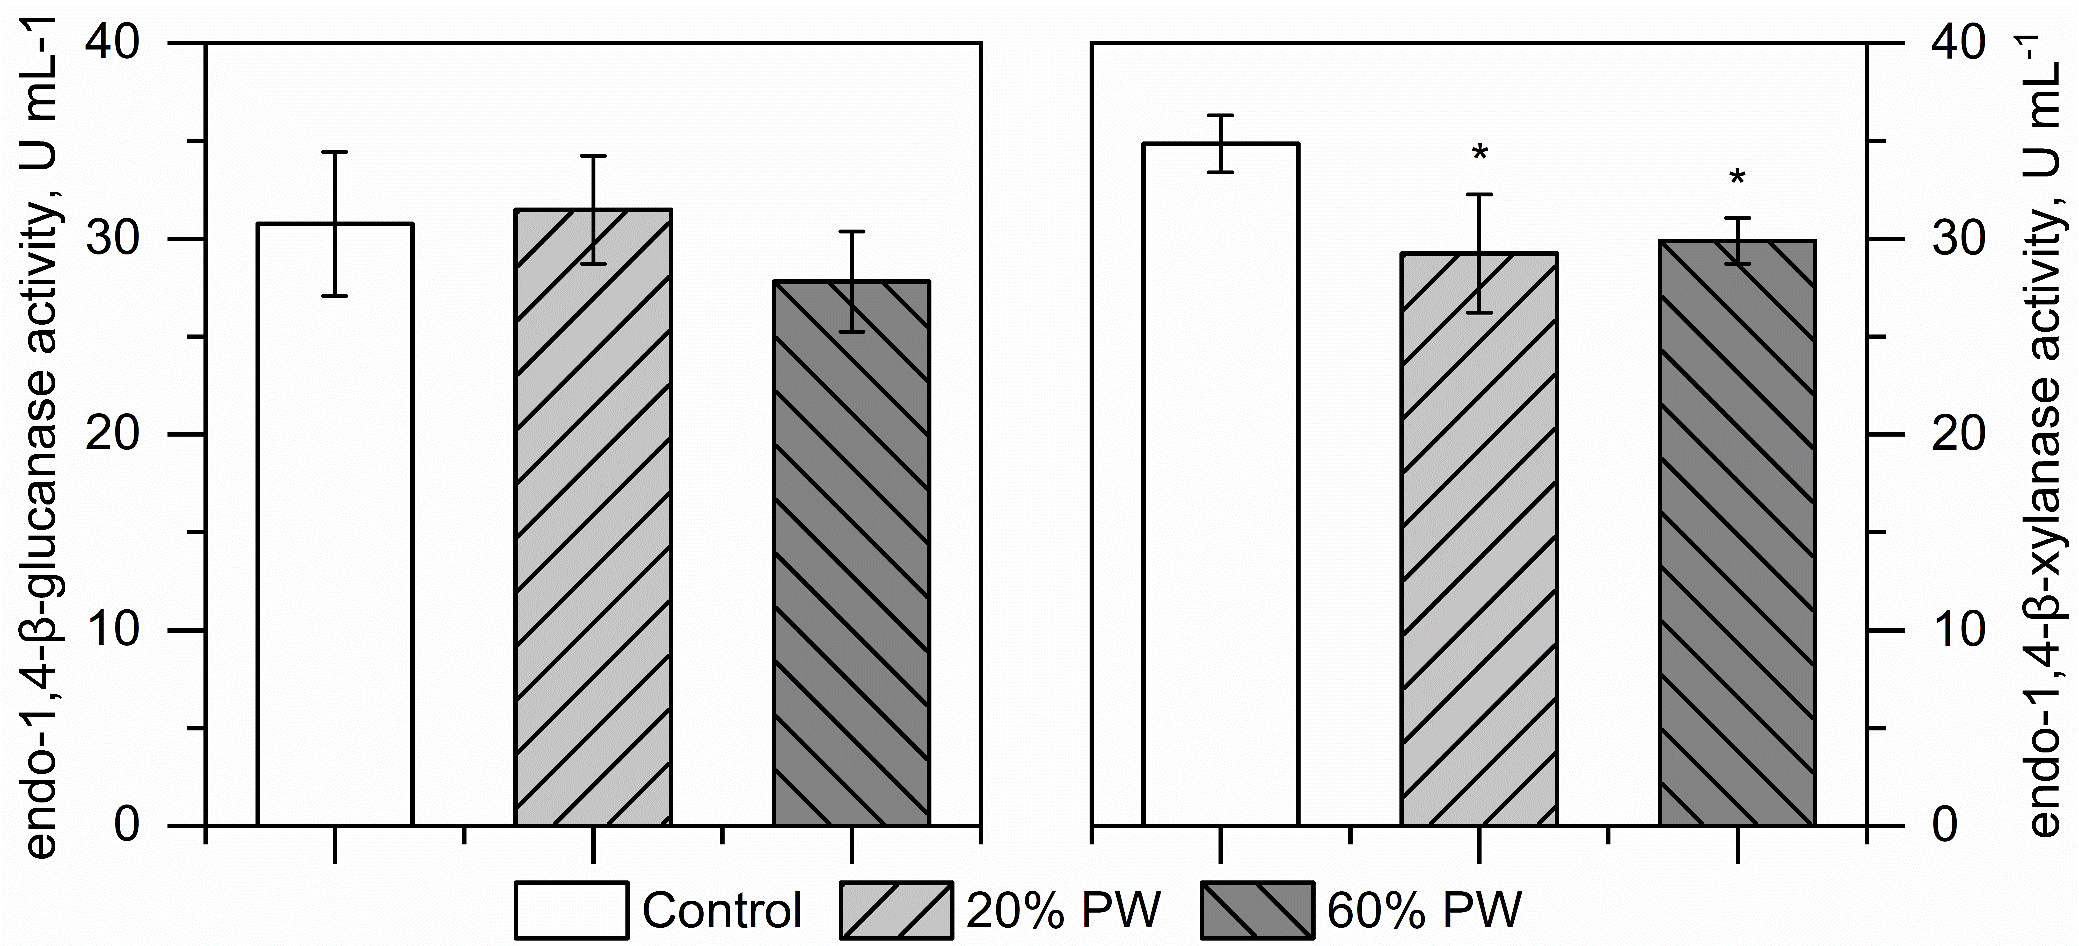


Fig. S3 Endoglucanase and endoxylanase activities of T. reesei RUT-C30 culture supernatants in the presence of increasing PW (% v/v) concentrations. Cultivation in MA medium with 1 % Avicel at 30 °C and 250 rpm. Significant differences (p>0.05) relative to the control are indicated by asterisks.


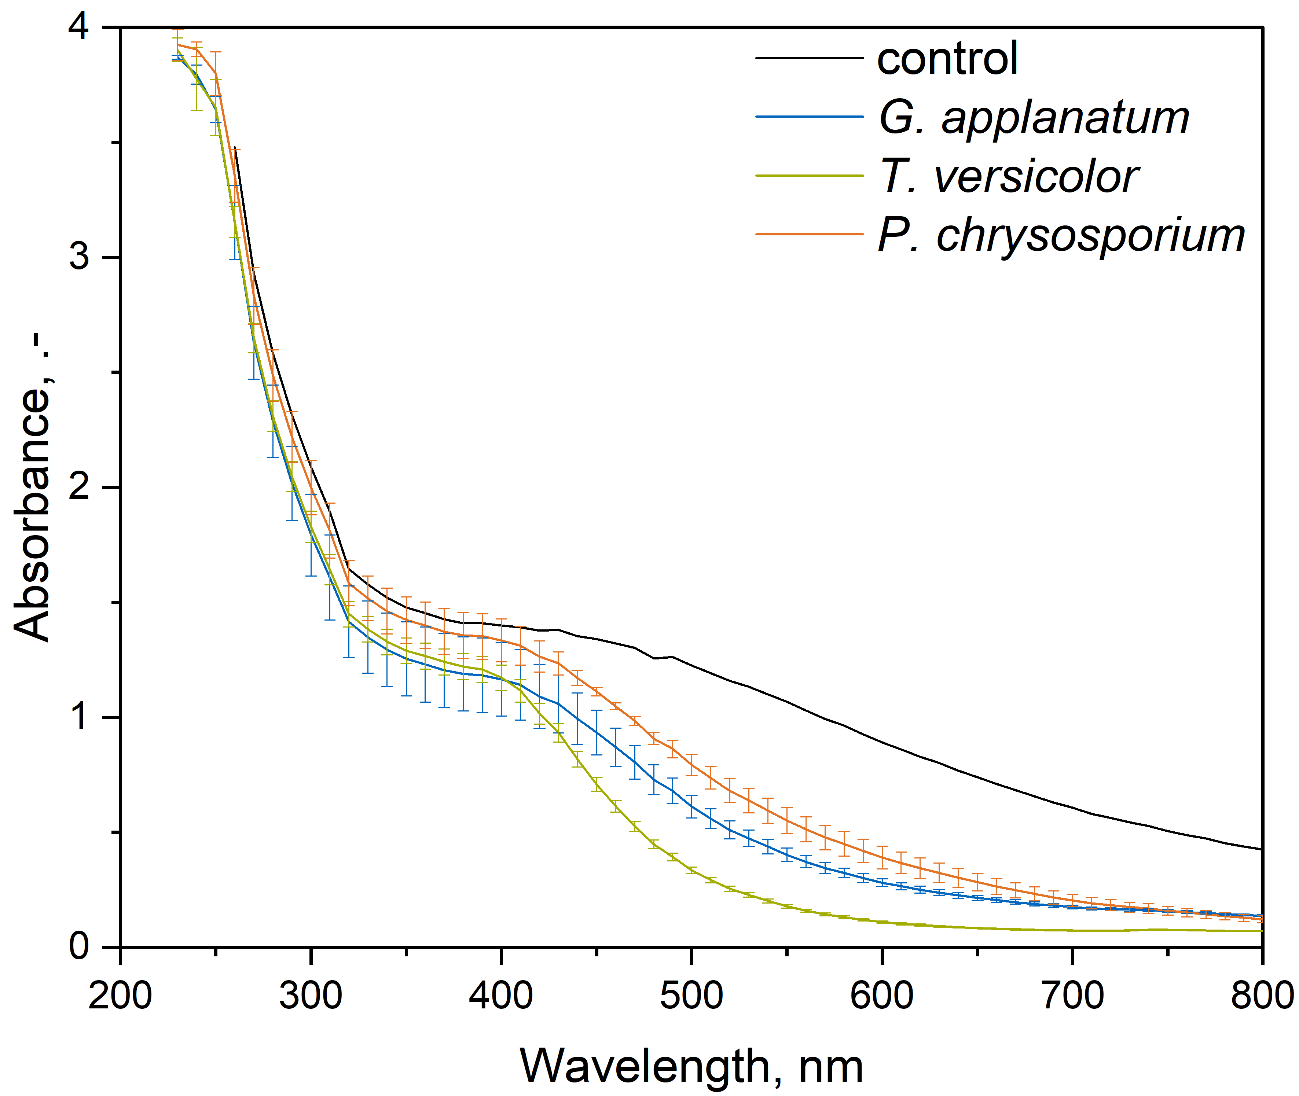


Fig. S4 Absorbance scan of the culture supernatants of *G. applanatum*, *T. versicolor*, and *P. chrysosporium* cultivated in 50% PW with potato dextrose yeast medium (PDY) in shaking flasks with 30 mL medium, at 100 rpm (50 mm throw), 28 °C. Absorbance in the range of 230 – 800 nm was measured in UV transparent cuvettes. Error bars indicate the standard deviation of biological triplicates. The control was not measured in replicates.


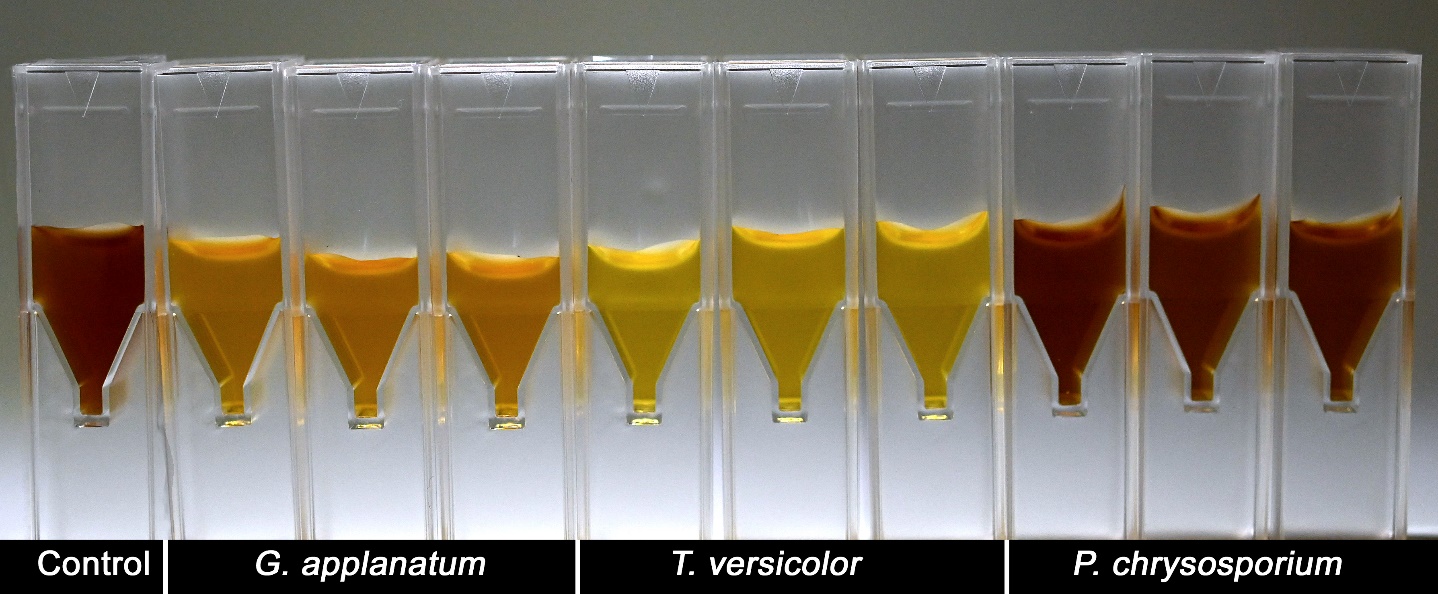


Fig. S5Photograph of the culture supernatants of *G. applanatum*, *T. versicolor*, and *P. chrysosporium* cultivated in 50% PW with potato dextrose yeast medium (PDY) in shaking flasks with 30 mL medium, at 100 rpm (50 mm throw), 28 °C.


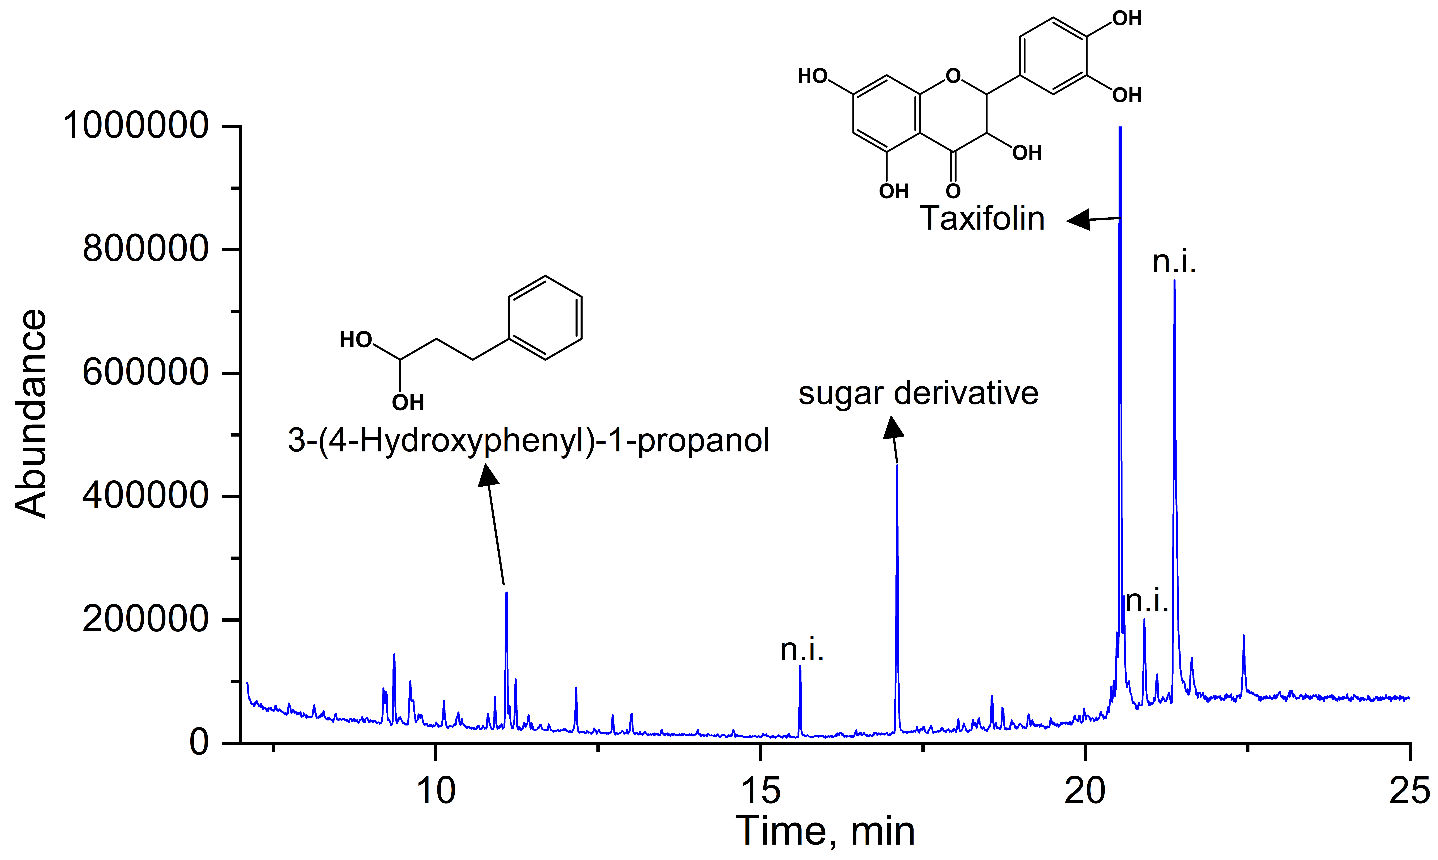


Fig. S6 Chromatogram of the GC/MS of the hydrophobic fraction of dissolved substances in the PW, concentrated with a C18ec SPE cartridge. Chemical formulas for 3-(4-Hydroxyphenyl)-1-propanol and taxifolin are showed. N.i., not identified.

**Supplementary Tables**

Table S: Ion concentration in PW Douglas-fir with bark relative to Mandels-Andreotti medium (MA)

|  | **PW** | |  | **MA-medium** | |
| --- | --- | --- | --- | --- | --- |
| mg L-1 | mM | mM | covered by PW, % |
| **PO43-** | 34.5 | 0.36 |  | 14.7 | 2.5 |
| **SO42-** | 29.6 | 0.31 |  | 11.85 | 2.6 |
| **NH4+** | 4.78 | 0.26 |  | 21.19 | 1.3 |
| **NO3-** | < 5 | - |  | - | - |
| **Na+** | 50.8 | 2.21 |  | - | - |
| **Ca2+** | 133 | 3.32 |  | 2.72 | 122.0 |
| **Mg2+** | 40.1 | 1.65 |  | 1.22 | 135.2 |
| **K+** | 109 | 2.79 |  | 14.7 | 19.0 |
| *Trace elements* | | | | | |
| **Fe2+** | 49.3 | 0.88 |  | 0.02 | 4414.0 |
| **Mn2+** | 13.8 | 0.25 |  | 0.01 | 2511.9 |
| **Zn2+** | 1.34 | 0.02 |  | 0.005 | 409.8 |

Table S: Compositional analysis of Douglas-fir wood chips (pressed and unpressed) expressed in % of the total weight

|  | Extractives | Lignin insoluble | Lignin soluble | Rha | Man | Ara | Gal | Xyl | Glu | Sum |
| --- | --- | --- | --- | --- | --- | --- | --- | --- | --- | --- |
| [%] | [%] | [%] | [%] | [%] | [%] | [%] | [%] | [%] | [%] |
| pressed | 1.36 | 27.6 | 0.6 | < 0,1 | 13.6 | 0.9 | 2.7 | 3.7 | 46.6 | 97.1 |
| not pressed | 1.53 | 27.3 | 0.7 | < 0,1 | 12.8 | 0.9 | 2.7 | 3.5 | 45.7 | 95.1 |
